# Supplementary material
Source: Springer Nature journal article supplement (https://www.springermedizin.de/resource/supplementary/12887_2012_622_MOESM2_ESM.pdf/9475466)

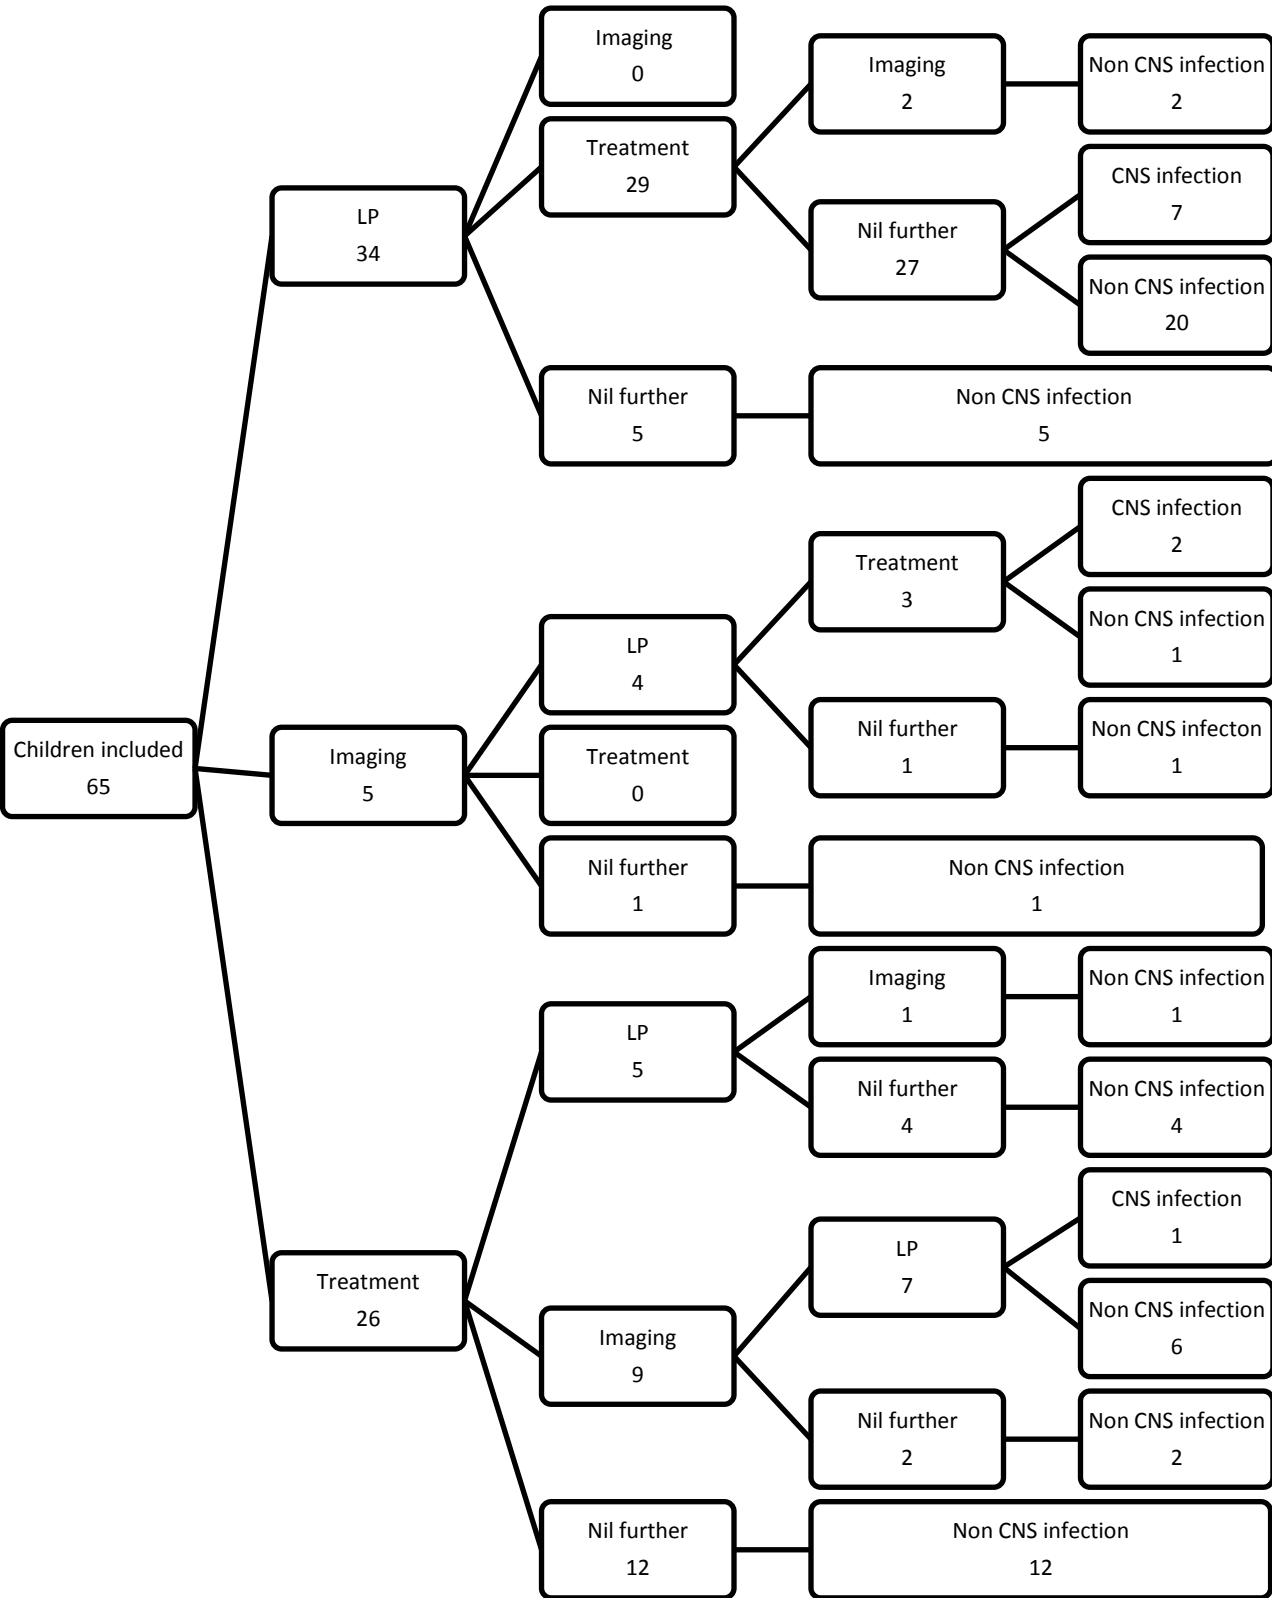

CNS=Central Nervous System, LP=Lumbar Puncture

Supplement: MOESM2 [file 9475466]
